## METHODS AND TECHNIQUES

# An improved method for detecting torpor entrance and arousal in a mammalian hibernator using heart rate data

Amanda D. V. MacCannell<sup>1,\*</sup>, Ethan C. Jackson<sup>2</sup>, Katherine E. Mathers<sup>1</sup> and James F. Staples<sup>1</sup>

## ABSTRACT

We used electrocardiogram (ECG) telemeters to measure the heart rate of hibernating *Ictidomys tridecemlineatus* (thirteen-lined ground squirrel). An increase in heart rate from 2.2 to 5 beats min<sup>-1</sup> accurately identified arousal from torpor before any change in body temperature was detected. Variability in raw heart rate data was significantly reduced by a forward-backward Butterworth low-pass filter, allowing for discrete differential analysis. A decrease in filtered heart rate to 70% of maximum values in interbout euthermia (from approximately 312 to 235 beats min<sup>-1</sup>) accurately detected entrance into torpor bouts. At this point, body temperature had fallen from 36.1°C to only 34.7°C, much higher than the 30°C typically used to identify entrance. Using these heart rate criteria allowed advanced detection of entrance and arousal (detected 51.9 and 76 min earlier, respectively), compared with traditional body temperature criteria. This method will improve our ability to detect biochemical and molecular markers underlying these transition periods, during which many physiological changes occur.

**KEY WORDS:** Butterworth filter, Electrocardiogram, ECG, Hibernation, *Ictidomys*

## INTRODUCTION

Hibernation in mammals, typified by the thirteen-lined ground squirrel [*Ictidomys tridecemlineatus* (Mitchill 1821)], consists of individual torpor bouts with two extreme metabolic and thermal states (see Staples, 2016 for a comprehensive review). Torpor periods are characterized by low and fairly constant core body temperature ( $T_b$ ; near 5°C at 5°C ambient) and metabolic rate (MR). Torpor is punctuated approximately every 10 days by periods of interbout euthermia (IBE) with  $T_b$  near 37°C and fairly stable MR, similar to those of summer, non-hibernating conspecifics. An arousal between torpor and IBE raises MR as much as 100-fold, followed by a rapid increase in  $T_b$ . The decline in MR and  $T_b$  during entrance into torpor is somewhat slower than their increase before arousal.

The rapid physiological changes that occur during entrance and arousal have inspired research into the mechanisms underlying the induction and cessation of these periods. Although the hunt for a ‘hibernation induction trigger’ has not yet been successful (see Staples, 2016 for a review), changes in several circulating metabolites during these transitions suggest significant

reorganization of tissue metabolism (Epperson et al., 2011). Fully understanding the signals that trigger such changes will require rapid tissue sampling at precise time points before, during and after these transitions.

Most experimental designs define torpor as the period during which  $T_b$  either: (1) remains below a certain value [typically 30°C (e.g. Zervanos et al., 2014), but sometimes as low as 25°C (e.g. Bieber et al., 2014)], or (2) declines more than a designated amount below ‘euthermic resting values’ (Ruf and Geiser, 2015). Such designs may be adequate for many field and laboratory studies, especially on small animals, but may not be able to detect key signals underlying the thermal and metabolic transitions of entrance and arousal. Indeed, such criteria would miss the latter stage of arousal and the beginning of the entrance stage, when many physiological changes occur. For example, in thirteen-lined ground squirrels, liver mitochondrial succinate metabolism is substantially suppressed between IBE and torpor (Mathers et al., 2017), but this suppression is fully realized long before  $T_b$  falls below 30°C during entrance (Chung et al., 2011). Some recent studies have employed more rigorous sampling regimes, designating ‘early arousal’ as occurring at  $T_b$  values between 7 and 12.8°C (Hindle and Martin, 2014). Unfortunately, changes in  $T_b$  lag behind those in MR (Ortmann and Heldmaier, 2000), so even experiments that use such rigorous  $T_b$  criteria may miss signals that initiate entrance and arousal, and their metabolic effects. More accurate methods for defining the transitions among torpor bout stages are required in order to fully understand the regulation of hibernation.

Improving our identification of these transitions will also advance our understanding of evolutionary and environmental patterns of hibernation. The duration of torpor and IBE periods depend largely on time of year and ambient temperature but, within individual species, these periods may differ among populations depending on latitude (Zervanos et al., 2010) and local environmental factors such as rainfall (Lehmer et al., 2006), as well as food quantity (Humphries et al., 2003) and quality (Munro et al., 2005). Reliance on arbitrary  $T_b$  thresholds for quantifying these periods has at least two characteristics that limit its utility. Firstly, to account for variability in  $T_b$ , the thresholds are quite conservative (e.g. >5°C below euthermic resting values; Ruf and Geiser, 2015). Secondly, changes in  $T_b$  lag behind those in MR (Ortmann and Heldmaier, 2000), so  $T_b$  will underestimate the duration of both arousal and entrance periods, and overestimate torpor and IBE. The magnitude of these errors will be greater for larger animals with higher thermal inertia and some large hibernators show only modest drops in  $T_b$  despite large changes in MR (Tøien et al., 2011). Improving the accuracy of these durations may be particularly important for intraspecific studies on the subtle effects of body mass on the duration of torpor and IBE periods (e.g. Bieber et al., 2014; Zervanos et al., 2014).

Some researchers have measured MR, using flow-through respirometry, to quantify torpor bout stages (e.g. Ortmann and

<sup>1</sup>Department of Biology, University of Western Ontario, London ON, N6A5B8, Canada. <sup>2</sup>Department of Computer Science, University of Western Ontario, London ON, N6A5B7, Canada.

\*Author for correspondence (amaccann@uwo.ca)

 A.D.V.M., 0000-0002-1294-5250

Heldmaier, 2000). Such measurements found that entrance begins at  $T_b$  values significantly higher than 30°C in a variety of hibernators weighing 15–406 g (Willis, 2007). While accurate at detecting transitions between stages, this approach has several disadvantages. Firstly, it requires costly systems for both respirometry and  $T_b$  telemetry. Secondly, respirometry measurements require sealing animals in air-tight chambers for extended periods, an unnatural situation that may affect torpor patterns (Willis, 2007). Finally, the most affordable respirometry systems can monitor only eight animals at a time, half that of most telemetry systems.

In many endotherms (reviewed in Green, 2011), including marsupial hibernators (Swoap et al., 2017), heart rate ( $f_H$ ) changes follow MR closely, with little lag, and thus  $f_H$  is a good candidate for monitoring hibernation states. Indeed,  $f_H$  is a good correlate of MR during torpor in bats (Currie et al., 2014). Electrocardiogram (ECG) telemeters have been used to characterize  $f_H$  during torpor in *Glis glis* (Elvert and Heldmaier, 2005) and a marsupial hibernator (Swoap et al., 2017), both facing a changing thermal regime. To our knowledge, however, no studies have used telemetric ECG data to identify transitions between torpor bout stages in a hibernator, perhaps because  $f_H$  can vary greatly within and among individuals.

Mathematical transformations of ECG data have been used for several years in clinical medicine to analyze  $f_H$  variability caused by cardiac malfunctions (e.g. John et al., 2017). Furthermore, spectral analysis of interbeat intervals has been used extensively to analyze regulation of cardiac function, for example in ectotherms under conditions that change metabolism using thermal (Seebacher and Franklin, 2004) or hormonal (Little and Seebacher, 2014) treatments. In this paper, we describe methods for analyzing telemetric ECG data from hibernators that accurately determine the beginning of the arousal and entrance periods. Our data show that this technique offers superior temporal resolution than using  $T_b$  alone. These data also permitted us to examine potential changes to cardiac regulation during these transitions.

## MATERIALS AND METHODS

### Animals

Data were collected from thirteen-lined ground squirrels, one of the most widely used experimental models for laboratory-based hibernation studies. All procedures were approved by the University of Western Ontario Animal Care Committee (protocol 2012-016) and followed Canadian Council on Animal Care guidelines. These animals were also used in our studies of mitochondrial metabolism (Mathers et al., 2017), so no additional animals were required for the current study. Details of ground squirrel trapping and husbandry can be found in our recent publications (e.g. Mathers et al., 2017). In summer, radio telemeters (ETA-F10 Data Sciences International, St Paul, MN, USA) were implanted under isoflurane anesthesia (Cesarovic et al., 2011), but were not switched on until hibernation began in late October. The transmitter body was placed within the abdominal cavity with the two leads stitched to the muscle of the thorax and abdomen, respectively. The surgery is only slightly more complicated than implantation of simple body temperature telemeters, and each procedure took no more than 30 min total. These small transmitters (1.6 g and 1.1 cm<sup>3</sup> volume) represented 0.8–1% of animal mass (range 152–208 g). The transmitters were designed for mice (approximately 25 g) so would be suitable even for small hibernators but, since the time of data collection (winter 2014), new transmitter models have been introduced with similar capabilities. Transmitters were calibrated by the manufacturer for temperature (resolution 0.05°C, accuracy 0.25°C).

### ECG and $T_b$ data collection

Telemetry data were collected using Data Sciences International data exchange matrix receivers placed directly under cages, allowing for continuous monitoring within the animals' home cages without further disturbances. This system can monitor up to 16 animals at once. ECG and  $T_b$  signals were collected in 1-min intervals every 3 min using the Acquisition application of Dataquest Advance Research Technology software (V4.3, Data Sciences International). From eight different animals, data from one randomly selected torpor bout between early January and early March were analyzed. Five of these animals were male and three female. Masses did not differ significantly between sexes [*t*-test,  $P=0.93$ ; males 174.4±17.3 g (mean±s.e.m.), females 176.1±10.2 g]. For one additional animal (male, 151.9 g), we analyzed data from three consecutive torpor bouts spanning 20 January to 11 February.

$f_H$  was calculated from the R–R intervals of ECGs using Ponemah software (Data Sciences International; V5.20-SP2). The R peaks were first identified using the automated ECG Analysis Attributes tool with the 'Rats' setting. We used a QRS detection threshold of 40% and a minimum R deflection of 0.25 mV. This automated process did not accurately detect R peaks at  $f_H$  values below 80 beats min<sup>-1</sup>, so we resorted to manual identification of R peaks. All data were analyzed *post hoc*, i.e. not in real time.

### Heart rate signal transformation and analysis

During arousal and IBE,  $f_H$  is highly variable over short time frames, with differences between consecutive sampling points as high as 150 beats min<sup>-1</sup>. Such variability makes it impractical to use absolute or relative thresholds of  $f_H$  to define entrance into torpor. We chose, therefore, to digitally filter the  $f_H$  data. We then used discrete differential analysis to define relative thresholds as criteria to determine when an animal was entering into a torpor bout.

To determine the transition between IBE and torpor, raw  $f_H$  data were transformed using a forward–backward Butterworth low-pass filter with a parametric critical frequency of 0.03 half cycles per  $f_H$  data point. Much more than a simple moving average, this technique strips high-frequency content from the signal above the parametric critical frequency, thereby minimizing sensitivity to volatility over short time frames. For most of the periods under study, the transformed  $f_H$  data ( $f_H$ -LP) tracks raw  $f_H$  smoothly (Fig. 1), allowing for small-window discrete differential analysis. Low-pass and related frequency domain filters have been used for  $f_H$  analysis since the early 1970s (Saykrs, 1973). Our algorithm can be adapted to different sampling protocols by changing the parametric critical frequency in inverse proportion to the sampling rate, i.e. if the  $f_H$  is determined every 1.5 min (instead of 3 min) the critical frequency must be divided by a factor of 2. Because the filter removes only high frequency content, a filtered signal from animals with lower  $f_H$  variability, such as hibernating bears (Laske et al., 2010), would resemble the raw signal more closely than it would from animals with more variable  $f_H$ , such as our ground squirrels. It is important, however, that users verify the efficacy of the filtering and threshold criteria for different animal models. All analyses were performed using custom software comprised of signal processing functions available in SciPy, an open-source library for scientific computing, and standard Python packages. The software information can be found in the Appendix. The use of forward–backward, first-order Butterworth filtering together with small-window discrete differential analysis is computationally inexpensive and suitable for real-time implementation.

From the  $f_H$ -LP data, we determined entrance into torpor using two criteria. Firstly,  $f_H$ -LP had to fall below a threshold proportion

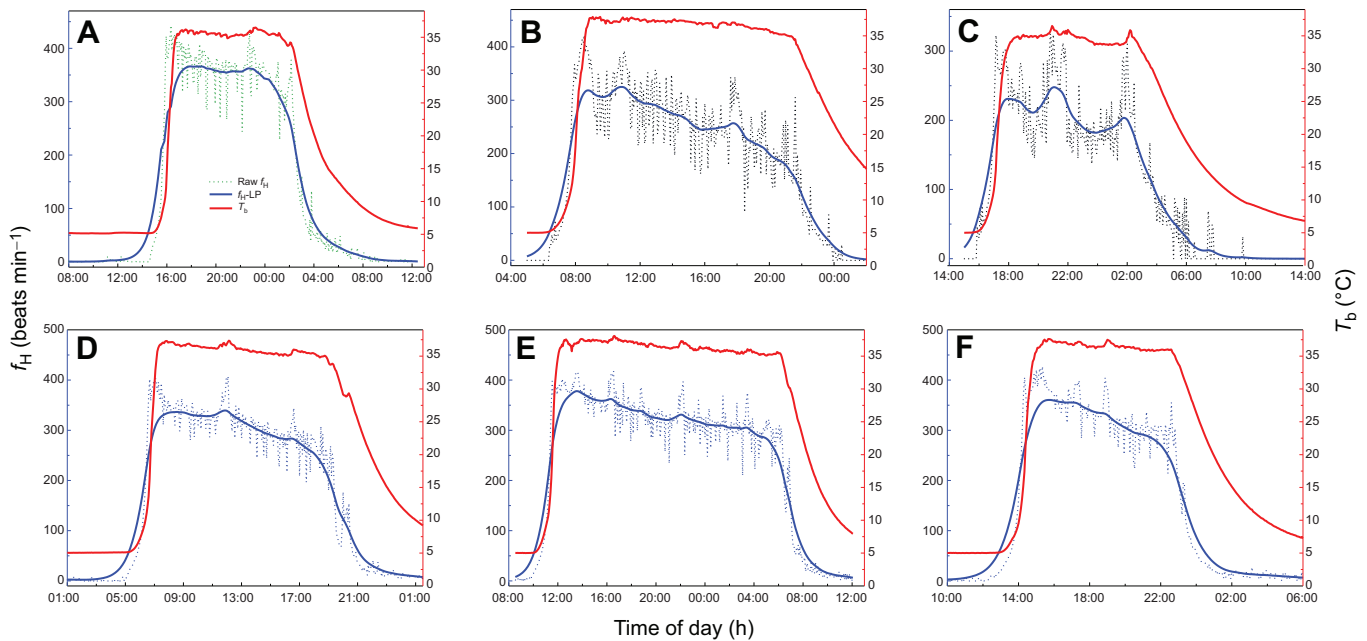

**Fig. 1.** Heart rate ( $f_H$ ) and body temperature ( $T_b$ ) during arousal, interbout euthermy (IBE) and entrance in *Ictidomys tridecemlineatus*.  $f_H$  is shown in raw form and after Butterworth low-pass filtering ( $f_{H-LP}$ ). Data are from three different animals (A–C), and from one individual over three consecutive torpor bouts (D–F).

of the maximum values. For each data set, we compared three such thresholds: 75, 70 and 65% of the maximum  $f_{H-LP}$  value observed during IBE. Secondly, when these thresholds were reached,  $f_{H-LP}$  had to decrease for three consecutive data collection points. For each data set, the accuracy of the determinations was confirmed using  $T_b$ . For example, if the  $f_{H-LP}$  criteria determined that the animal was entering torpor, but the  $T_b$  showed that the animal subsequently continued in IBE, this result was deemed a false positive.

We also compiled  $T_b$  data from each animal as they reached our  $f_{H-LP}$  criteria for entrance into torpor, a similar approach as used by Willis for MR (Willis, 2007). We then explored the possibility that these  $T_b$  values could serve as a proxy to detect entrance. We calculated the minimum  $T_b$  and mean  $T_b$ –95% confidence interval for both the 70 and 65%  $f_{H-LP}$  criteria. We then analyzed  $T_b$  data from individual bouts of 30 different *I. tridecemlineatus* hibernating under the same conditions and over the same time periods. We determined in how many of these bouts animals entered torpor directly if  $T_b$  fell below these values. False positive predictions were identified as bouts during which  $T_b$  fell below these levels but subsequently rose above them for longer than 30 min, indicating that animal was still in IBE.

To detect the beginning of arousal, we used a similar HR threshold technique but, because HR during torpor is remarkably invariable within individuals, we were able to use raw  $f_H$  data without filtering. We set criteria for the beginning of arousal as the time at which  $f_H$  increased beyond 5 beats  $\text{min}^{-1}$  and had increased for three consecutive data collection points.

### Spectral analysis of $f_H$ variability

We also assessed the potential for differential autonomic control of cardiac function between entrance and arousal using the Data Parser tool of the Ponemah software to assess HR variability in the raw data. This analysis converts R–R intervals from successive heart beats to frequency domains. Higher frequency domains (e.g. 0.193–0.700 Hz) indicate parasympathetic regulation, whereas sympathetic (adrenergic) regulation is indicated by lower

frequencies (0.022–0.07 Hz) (Altimiras, 1999). The data were compared by two-way ANOVA.

## RESULTS AND DISCUSSION

Examples of ECG signals collected from one animal in different stages of the same torpor bout are presented in Fig. S1. Although somewhat noisy in arousal, a clear R signal was always visible. Around the midpoint of a torpor bout (3–5 days after entrance),  $f_H$  was remarkably stable at 2.2 beats  $\text{min}^{-1}$  (Table 1). During IBE,  $f_H$  was quite variable but, following our data filtering algorithm,  $f_{H-LP}$  tracked raw  $f_H$  closely, at least at high  $f_H$  values (Fig. 1). At lower  $f_H$  values, e.g. early during arousal and late during entrance, the filtering consistently overestimated  $f_H$ , but our analysis did not consider  $f_{H-LP}$  data for these periods. In all stages, the low-pass filter reduced data variability substantially (Table 1). Around the IBE midpoint,  $f_H$  was approximately 140-fold higher than during steady-state torpor. For eight individuals analyzed, maximum  $f_H$  occurred late in arousal when  $T_b$  had risen to approximately 33°C. These patterns agree closely with those from the same individual over three consecutive bouts (Fig. 1).

**Table 1.** Properties of heart rate ( $f_H$ ) and body temperature ( $T_b$ ) during different phases of torpor bouts in *Ictidomys tridecemlineatus*

| Condition              | $T_b$ (°C) | Raw $f_H$ (beats $\text{min}^{-1}$ ) | $f_{H-LP}$ (beats $\text{min}^{-1}$ ) |
|------------------------|------------|--------------------------------------|---------------------------------------|
| Mid-torpor             | 5.0±0.0    | 2.2±0.2                              | N/A                                   |
| Arousal $f_H$ criteria | 5.4±0.6    | 5                                    | N/A                                   |
| 'Early' arousal        | 7          | 235.4±34.9                           | N/A                                   |
| Maximum $f_H$          | 34.3±3.3   | 412.5±19.6                           | 338.0±10.2                            |
| Mid-IBE                | 35.3±0.4   | 322.8±17.4                           | 311.9±10.2                            |
| 70% entrance criteria  | 34.4±0.5   | 262.2±50.5                           | 235.4±7.4                             |
| 65% entrance criteria  | 33.5±0.4   | 241.0±32.6                           | 216.4±6.4                             |
| 'Early' entrance       | 30         | 129.0±24.1                           | 143.1±7.1                             |

Where appropriate, data are reported as means±s.e.m. with a sample size of 8. For details of  $f_H$  low-pass data filtering ( $f_{H-LP}$ ), consult the Materials and methods. IBE, interbout euthermy.

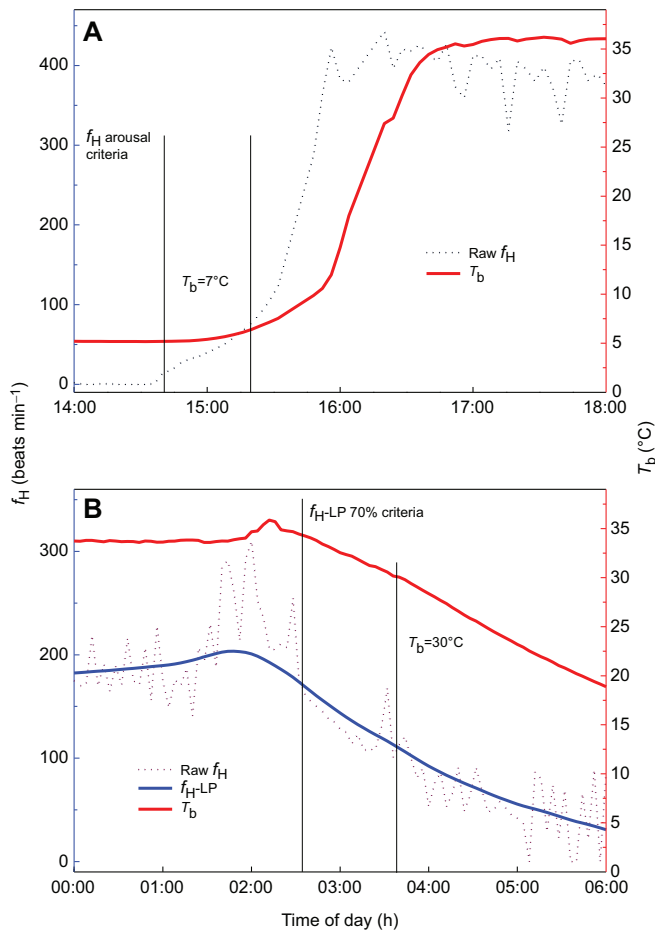

**Fig. 2. Heart rate ( $f_H$ ) and body temperature ( $T_b$ ) during arousal and entrance in *Ictidomys tridecemlineatus*.** The raw  $f_H$  criteria for arousal (A; first vertical black line) occurred before any change in  $T_b$  was discernible, 39 min before  $T_b$  reached 7°C (second vertical black line). During entrance (B), the filtered  $f_H$  data ( $f_H$ -LP) fell below 70% of maximum  $f_H$ -LP (first vertical black line), 64 min before  $T_b$  fell to 30°C (second vertical black line).

Our criteria detected the beginning of arousal accurately in all cases: after  $f_H$  reached 5 beats  $\text{min}^{-1}$ , with increases over three consecutive sampling points, all animals continued to arouse into IBE. At the time points where arousal criteria were met,  $T_b$  was statistically indistinguishable from torpor ( $P=0.195$ ; Fig. 2, Table 1). An average of  $51.9 \pm 3.1$  min elapsed between the time at which our  $f_H$  criteria indicated arousal and the time it took  $T_b$  to increase from 5 to 7°C, an indicator of ‘early arousal’ previously used in this species (Hindle and Martin, 2014). This time lag did not depend on animal mass ( $P>0.05$ ; Fig. S2). By the time  $T_b$  reached 7°C,  $f_H$  had increased more than 100-fold ( $P<0.001$ , paired  $t$ -test; Table 1). We suggest that studies that use  $T_b$  to detect arousal, even with stringent criteria, risk missing signals that underlie substantial increases in HR and, presumably, many other physiological parameters. Although the HR criteria detected arousal almost an hour before  $T_b$ , this temporal difference represents  $<1\%$  of a typical torpor bout duration in this species (Russell et al., 2010), although in larger hibernators this proportion will likely be higher.

The data-filtering algorithm decreased variability, allowing for discrete differential analysis of  $f_H$ -LP data during entrance. Applying two of our criteria ( $f_H$ -LP falling to 70 or 65% maximal  $f_H$ -LP, and decreasing over three consecutive sampling points) predicted entrance into torpor bouts with no false positives in the 11

data sets analyzed. We rejected the 75% maximal  $f_H$ -LP criteria because it produced one false positive: after the criteria were met, the animal did not proceed directly into torpor, and both  $T_b$  and  $f_H$ -LP increased temporarily. We conclude that this technique can accurately detect entrance if appropriate criteria are employed.

Even using conservative criteria, our method provides considerably better temporal resolution for detecting entrance than previous methods. When our 70 and 65%  $f_H$ -LP were reached in eight individual ground squirrels,  $T_b$  was significantly lower ( $P<0.001$ , repeated measures ANOVA) than  $T_b$  in mid-IBE, but by only 1.3–2.0°C (Table 1). These  $T_b$  values were close to those determined in one individual over three consecutive bouts ( $35.7 \pm 0.4^\circ\text{C}$  and  $35.3 \pm 0.2^\circ\text{C}$ , respectively) but considerably higher than the 30°C used previously to identify entrance in this species (Chung et al., 2011) and other hibernators (Zervanos et al., 2014). These  $T_b$  values agree very closely with MR data used to identify entrance in various hibernators, including ground squirrels of a similar size and held at similar temperatures as the animals in the present study (Willis, 2007), demonstrating that  $f_H$  serves as an excellent proxy for MR in these systems. By the time  $T_b$  fell to 30°C,  $f_H$  fell by close to 60% compared with values at mid-IBE. The average time that elapsed between  $f_H$ -LP reaching the 65% criteria and  $T_b$  falling to 30°C was  $54.9 \pm 10.7$  min. Using 70% criteria significantly increased (one-tailed paired  $t$ -test,  $P=0.000178$ ) this elapsed time to an average of  $76.0 \pm 14.9$  min. There was no significant effect of sex on these lag times ( $t$ -test,  $P>0.05$ ), nor any significant correlation ( $P>0.05$ ; Fig. S2) with animal mass, but the mass range was quite small (151.9–208.3 g). Larger hibernating species, such as marmots (mass  $\sim 4000$  g) have greater thermal inertia, so these lag times will presumably be greater. Our method will improve detection of both entrance and arousal, and provide more accurate determinations of torpor and IBE durations, especially in large hibernators. Indeed, we would be interested to see this method applied to the largest hibernators, such as black bears, from which detailed data sets on ECG,  $T_b$  and even MR exist (Tøien et al., 2011).

We recognize that it is more challenging to collect and analyze  $f_H$  data than simple  $T_b$  data, so we explored the possibility that the  $T_b$  at which our  $f_H$ -LP occurred could accurately detect entrance into torpor. The minimum  $T_b$  at which the 70% criterion was reached was 33.4°C and the mean  $T_b$ –95% confidence interval was 34.3°C. For the 65% criterion these values were 32.1 and 33.3°C, respectively. Using data from 30 separate animals we found that these  $T_b$  values were poor predictors of entrance. A  $T_b$  of 34.3°C accurately predicted entrance in only 36.7% of bouts. Reducing this threshold to the more conservative level of 33.3°C still accurately predicted entrance in only 60% of bouts. Even the most conservative  $T_b$  derived from our  $f_H$ -LP analysis, 32.1°C, produced false positive predictions of entrance in 20% of the bouts. The  $T_b$  threshold of 30°C, frequently used in hibernation studies, accurately predicted entrance in all but one of 30 bouts (96.7% accuracy). Although  $T_b$  may be easier to measure than HR, it is still an unreliable predictor of entrance into torpor unless very conservative criteria are applied, by which time the average animal is already approximately an hour into entrance.

Characteristics of the ECGs (e.g. shape, magnitude, phase duration) appear to differ among torpor bout stages (Fig. S1), suggesting differential regulation, as reported recently in a marsupial hibernator (Swoap et al., 2017). Our data suggest that both sympathetic and parasympathetic regulation is significantly lower in the early stages of arousal than during entrance (Fig. S3). During arousal there appears to be a trend towards greater

sympathetic than parasympathetic regulation, but the data are quite variable, precluding statistical significance.

Our technique uses fairly simple data filtering that is readily available and widely used in computer sciences and clinical cardiology. We believe that it could be easily adapted to current data acquisition software to provide real-time detection of entrance and arousal. It can also be applied *post hoc* to improve the accuracy of existing data sets. This method significantly advances the time at which the beginning to entrance and arousal can be identified, so it will improve the ability to detect signals that underlie metabolic suppression and other physiological changes associated with torpor. Moreover, our method will improve quantification of the duration of torpor bout stages and, therefore, our understanding of how they are regulated within and among hibernating species.

The technique is currently best suited to laboratory experiments, and applying it to field studies may be challenging. The telemetry receivers used here must be very close to the instrumented animals and are not designed for outdoor deployment. Some systems (e.g. TSE Systems, Chesterfield, MO, USA) have implants that can transmit up to 5 m, potentially allowing use in semi-natural outdoor enclosures (e.g. Bieber et al., 2014), but, to our knowledge, these transmitters have not been tested at temperatures below 15°C and it is unclear whether the receivers are weatherproof. ECG signals can produce very large data files, a challenge for on-board data logging. Recently, small data storage tags have been used to monitor  $f_H$  and  $T_b$  in free-moving crustaceans (McGaw et al., 2018), but their storage capacity is limited. Custom-built data loggers have been used to record ECGs in free-ranging black bears (Laske et al., 2010), but their size precludes use in all but the largest hibernators. Hopefully, advances in transmitter and storage technology will allow for broader use of this technique in the future.

## APPENDIX

Signal filtering and  $f_H$ -based threshold detection was performed using a custom code written in Python 3.6 with NumPy for basic mathematical functions and SciPy for signal processing functions. NumPy and SciPy are both free, open-source software libraries included in most distributions of Python for scientific applications.

To use the software, we recommend the Anaconda distribution of Python 3.6, which includes all necessary packages. Anaconda can be obtained freely (<https://www.anaconda.com/download/>) and is compatible with all major operating systems.

The software assumes that there is a directory called `Data/` in the same directory as `Analysis.py`. `Data/` should contain separate .csv (comma separated values) input files for each data set being analyzed, e.g. one torpor-IBE event. The columns of each .csv file should be arranged in the following order: absolute time (any format),  $T_b$  (°C) and  $f_H$  (beats min<sup>-1</sup>). In our data, the sample interval for both  $T_b$  and  $f_H$  was 4 min. This parameter must be changed on line 204 of `Analysis.py` if a different sample interval is used. Other parameters, such as the critical frequency for low-pass filtering or  $f_H$ -LP values used to define thresholds, are modifiable according to comments in the code.

For each .csv input file processed, two output .csv files are created in a subdirectory `Analysis/`. The first contains both the original and filtered time series used to compute the various thresholds discussed in this paper. This file is named `Data-X.csv`, where `X` is the prefix of the corresponding input file. In this file the columns are arranged as follows: time point index (starting at 0), time (same format as input), HR (beats min<sup>-1</sup>),  $f_H$ -LP (beats min<sup>-1</sup>) and  $T_b$  (°C). The second output .csv file, named `Analysis-X.csv`, contains a summary

of  $T_b$  (°C),  $f_H$  (beats min<sup>-1</sup>),  $f_H$ -LP (beats min<sup>-1</sup>) and absolute time (same format as input) as computed according to various thresholds or conditions.

The Python code, further information and an example of input and output are available at <https://github.com/ethancjackson/HR-Analysis>.

## Acknowledgements

We thank Alvin Iverson and the staff of the Carman and Area Research Centre (University of Manitoba) for their help in obtaining animals. Sarah McFarlane and Dr Jason Brown helped with surgeries.

## Competing interests

The authors declare no competing or financial interests.

## Author contributions

Conceptualization: J.F.S.; Methodology: A.D.V.M., E.C.J., K.E.M., J.F.S.; Formal analysis: A.D.V.M., E.C.J., K.E.M.; Writing - original draft: A.D.V.M., E.C.J., K.E.M., J.F.S.; Writing - review & editing: A.D.V.M., E.C.J., K.E.M., J.F.S.; Supervision: J.F.S.; Funding acquisition: J.F.S.

## Funding

This research was supported by a Discovery Grant from the Natural Sciences and Engineering Research Council of Canada (RGPIN-2014-04860) and the Faculty of Science, University of Western Ontario (Western University; grant number R3061A08).

## Supplementary information

Supplementary information available online at <http://jeb.biologists.org/lookup/doi/10.1242/jeb.174508.supplemental>

## References

- Altimiras, J. (1999). Understanding autonomic sympathovagal balance from short-term heart rate variations. Are we analyzing noise? *Comp. Biochem. Physiol. A Mol. Integr. Physiol.* **124**, 447-460.
- Bieber, C., Lebl, K., Stalder, G., Geiser, F. and Ruf, T. (2014). Body mass dependent use of hibernation: why not prolong the active season, if they can? *Funct. Ecol.* **28**, 167-177.
- Cesarovic, N., Jirkof, P., Rettich, A. and Arras, M. (2011). Implantation of radiotelemetry transmitters yielding data on ECG, heart rate, core body temperature and activity in free-moving laboratory mice. *J. Vis. Exp.* **57**, e3260.
- Chung, D., Lloyd, G. P., Thomas, R. H., Guglielmo, C. G. and Staples, J. F. (2011). Mitochondrial respiration and succinate dehydrogenase are suppressed early during entrance into a hibernation bout, but membrane remodeling is only transient. *J. Comp. Physiol. B* **181**, 699-711.
- Currie, S. E., Körtner, G. and Geiser, F. (2014). Heart rate as a predictor of metabolic rate in heterothermic bats. *J. Exp. Biol.* **217**, 1519-1524.
- Elvert, R. and Heldmaier, G. (2005). Cardiorespiratory and metabolic reactions during entrance into torpor in dormice, *Glis glis*. *J. Exp. Biol.* **208**, 1373-1383.
- Epperson, L. E., Karimpour-Fard, A., Hunter, L. E. and Martin, S. L. (2011). Metabolic cycles in a circannual hibernator. *Physiol. Genomics* **43**, 799-807.
- Green, J. A. (2011). The heart rate method for estimating metabolic rate: Review and recommendations. *Comp. Biochem. Physiol. A Mol. Integr. Physiol.* **158**, 287-304.
- Hindle, A. G. and Martin, S. L. (2014). Intrinsic circannual regulation of brown adipose tissue form and function in tune with hibernation. *Am. J. Physiol. Endocrinol. Metab.* **306**, E284-E299.
- Humphries, M. M., Kramer, D. L. and Thomas, D. W. (2003). The role of energy availability in mammalian hibernation: an experimental test in free-ranging eastern chipmunks. *Physiol. Biochem. Zool.* **76**, 180-186.
- John, M., Neil, R., Chun-Li, W. and Hau-tieng, W. (2017). Single-lead f-wave extraction using diffusion geometry. *Physiol. Meas.* **38**, 1310.
- Laske, T. G., Harlow, H. J., Garshelis, D. L. and Iazzo, P. A. (2010). Extreme respiratory sinus arrhythmia enables overwintering black bear survival—physiological insights and applications to human medicine. *J. Cardiovasc. Transl. Res.* **3**, 559-569.
- Lehmer, E., Savage, L. T., Antolin, M. F. and Biggins, D. E. (2006). Extreme plasticity in thermoregulatory behaviors of free Ranging black-tailed prairie dogs. *Physiol. Biochem. Zool.* **79**, 454-467.
- Little, A. G. and Seebacher, F. (2014). Thyroid hormone regulates cardiac performance during cold acclimation in zebrafish (*Danio rerio*). *J. Exp. Biol.* **217**, 718-725.

- Mathers, K. E., McFarlane, S. V., Zhao, L. and Staples, J. F.** (2017). Regulation of mitochondrial metabolism during hibernation by reversible suppression of electron transport system enzymes. *J. Comp. Physiol. B* **187**, 227-234.
- McGaw, I. J., Steel, S. C., Leeuwen, T. E. V., Eliason, E. J. and Cooke, S. J.** (2018). Application of miniature heart-rate data loggers for use in large free-moving decapod crustaceans: method development and validation. *Physiol. Biochem. Zool.* **91**, 731-739.
- Munro, D., Thomas, D. W. and Humphries, M. M.** (2005). Torpor patterns of hibernating eastern chipmunks *Tamias striatus* vary in response to the size and fatty acid composition of food hoards. *J. Anim. Ecol.* **74**, 692-700.
- Ortmann, S. and Heldmaier, G.** (2000). Regulation of body temperature and energy requirements of hibernating Alpine marmots (*Marmota marmota*). *Am. J. Physiol.* **278**, R698-R704.
- Ruf, T. and Geiser, F.** (2015). Daily torpor and hibernation in birds and mammals. *Biol. Rev.* **90**, 891-926.
- Russell, R. L., O'Neill, P. H., Epperson, L. E. and Martin, S. L.** (2010). Extensive use of torpor in 13-lined ground squirrels in the fall prior to cold exposure. *J. Comp. Physiol. B* **180**, 1165-1172.
- Saykrs, B. M.** (1973). Analysis of heart rate variability. *Ergonomics* **16**, 17-32.
- Seebacher, F. and Franklin, C. E.** (2004). Integration of autonomic and local mechanisms in regulating cardiovascular responses to heating and cooling in a reptile (*Crocodylus porosus*). *J. Comp. Physiol. B* **174**, 577-585.
- Staples, J. F.** (2016). Metabolic flexibility: hibernation, torpor and estivation. *Comp. Physiol.* **6**, 737-771.
- Swoap, S. J., Körtner, G. and Geiser, F.** (2017). Heart rate dynamics in a marsupial hibernator. *J. Exp. Biol.* **220**, 2939-2946.
- Tøien, Ø., Blake, J., Edgar, D. M., Grahn, D. A., Heller, H. C. and Barnes, B. M.** (2011). Hibernation in black bears: independence of metabolic suppression from body temperature. *Science* **331**, 906-909.
- Willis, C. K. R.** (2007). An energy-based body temperature threshold between torpor and normothermia for small mammals. *Physiol. Biochem. Zool.* **80**, 643-651.
- Zervanos, S. M., Maher, C. R., Waldvogel, J. A. and Florant, G. L.** (2010). Latitudinal differences in the hibernation characteristics of woodchucks (*Marmota monax*). *Physiol. Biochem. Zool.* **83**, 135-141.
- Zervanos, S. M., Maher, C. R. and Florant, G. L.** (2014). Effect of Body Mass on Hibernation Strategies of Woodchucks (*Marmota monax*). *Integr. Comp. Biol.* **54**, 443-451.
